# Supplementary material
Source: Springer Nature journal article supplement (https://www.springermedizin.de/resource/supplementary/13054_2011_474_MOESM8_ESM.pdf/9708528)

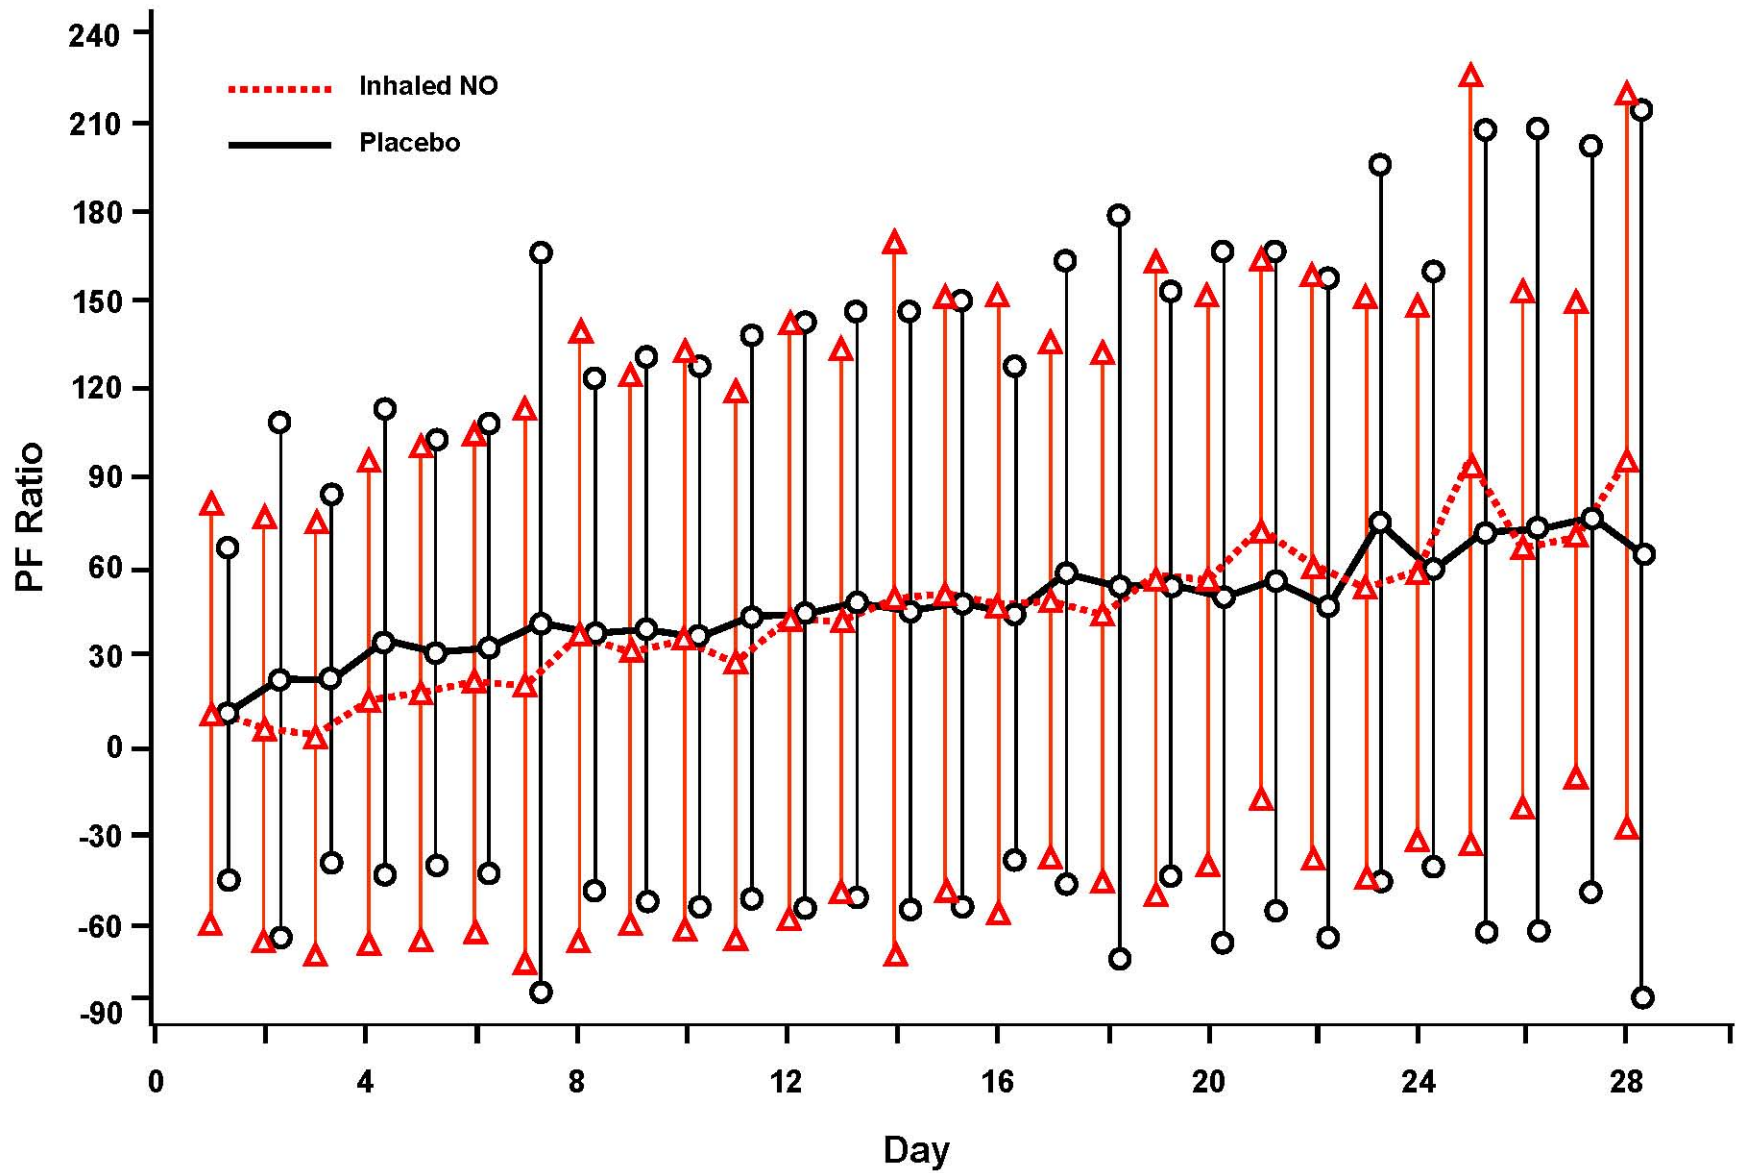

Supplement: MOESM8 [file 9708528]
